# Supplementary material for: Silica depleted rice hull ash (SDRHA), an agricultural waste, as a high-performance hybrid lithium-ion capacitor
Source: Royal Society of Chemistry journal article supplement (doi:10.1039/d0gc01746a), 2020-01-01
Supplement: d0gc01746a1.pdf [file d0gc01746a1.pdf]

## Supporting Information

### Silica depleted rice hull ash (SDRHA), an agricultural waste, as a high-performance hybrid lithium-ion capacitor.

Eleni Temeche, Mengjie Yu, and Richard M. Laine\*

Department of Materials Science and Engineering, University of Michigan, Ann Arbor, MI, 48109-2136, USA

\*Corresponding author. Tel.: +1 734 764 6203; fax: +1 734 763 4788.

E-mail address: talsdad@umich.edu (Richard M. Laine).

#### Optical images of RHA

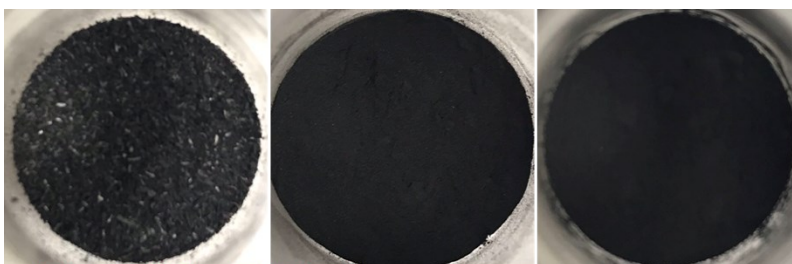

**Fig. S1.** Optical image of **a.** RHA, **b.** washed RHA, and **c.** SDRHA.

#### Microstructure of SDRHA electrode cast on Cu foil

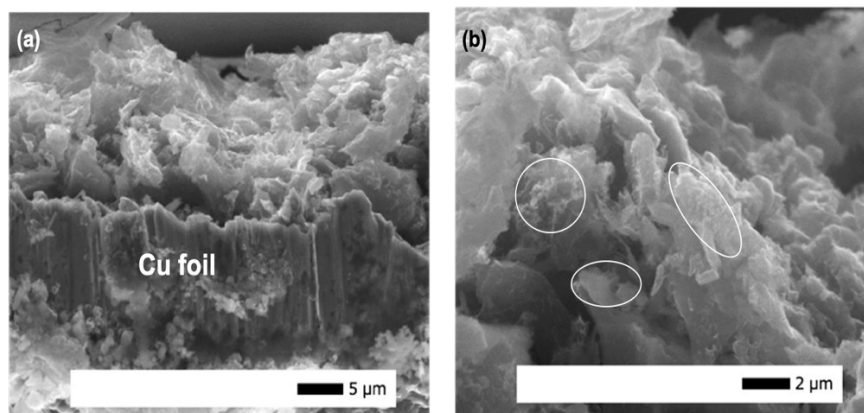

**Fig S2.** **a.** SEM fracture surface images of Cu/SDRHA electrode and **b.** SDRHA electrode with circled C65 additives.

## XPS analysis of SDRHA

**Table S1.** Atomic positions and weight percent of SDRHA powders deduced from XPS study.

| Elements | Position | Atomic wt. % |
|----------|----------|--------------|
| O 1s     | 530      | 4.05         |
| C 1s     | 284      | 69.35        |
| N 1s     | 396      | 12.02        |
| Ca 2p    | 346      | 0.87         |

## Galvanostatic cycle of SDRHA/NMC622

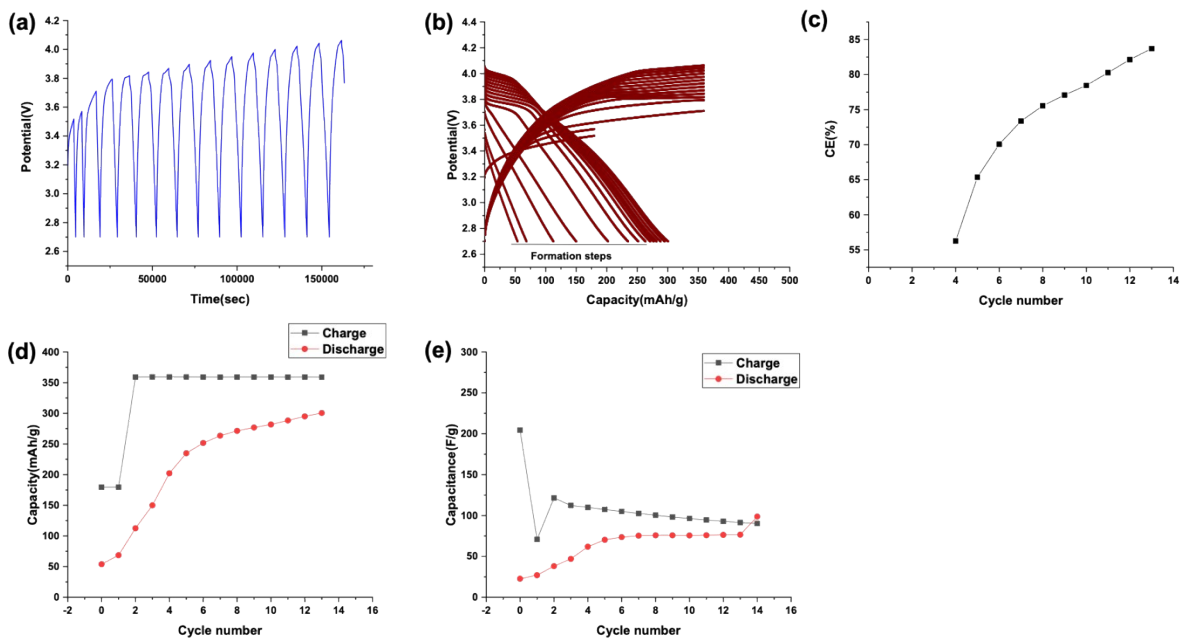

**Fig S3.** Electrochemical performance of SDRHA/NMC622 cell before SEI formation. **a.** potential vs time profile, **b.** charge-discharge curves, **c.** Coulombic efficiency, **d.** specific capacity, and **e.** specific capacitance as function of cycle number.

**Table S3.** Charge-transfer resistance of the half and full hybrid LICs.

| Electrode    | $R_e$ ( $\Omega$ ) | $C_{dl}$ ( $\mu F$ ) | $R_{ct}$ ( $\Omega$ ) |
|--------------|--------------------|----------------------|-----------------------|
| SDRHA/Li     | 3.5                | 1.2                  | 4.5                   |
| SDRHA/NMC622 | 3                  | 2.5                  | 18.4                  |
